# Supplementary material for: In situ analysis of heavy metals and halogenated compounds in reclaimed water using novel electrospray ionization combined with plasma ionization linear ion trap mass spectrometry
Source: PubMed Central journal article supplement — RSC Adv. 2024 Dec 6;14(52):38634–44. doi: 10.1039/d4ra04995k (PMC11622783; doi:10.1039/d4ra04995k), 2024-12-06
Supplement: RA-014-D4RA04995K-s001.pdf [file RA-014-D4RA04995K-s001.pdf]

**In situ analysis of heavy metals and halogenated compounds in reclaimed water using novel electrospray ionization combined with plasma ionization linear ions trap mass spectrometry**

Nazifi Sani Shuaibu<sup>#1</sup>, Gaosheng Zhao<sup>#2\*</sup>, Fengjian Chu<sup>1</sup>, Balarabe Bilyaminu Ismail<sup>3</sup>, Aso Ali Abdalmohammed Shateri<sup>1</sup>, Anas Abdullahi Muhammad<sup>4</sup>, Ammar Muhammad Ibrahim<sup>5</sup>, Musbahu Garba Indabawa<sup>5</sup>, and Xiaozhi Wang<sup>1\*</sup>

Zhejiang University College of Information Science and Electronic Engineering, Hangzhou 310027, Zhejiang Province, China.

<sup>2</sup>Shanghai University School of Environmental and Chemical Engineering, Shanghai 200444, China.

<sup>3</sup>Department of Food Science and Technology, Faculty of Agriculture, Bayero University, Kano PMB 3011, Kano, Nigeria.

<sup>4</sup>Department of Welding and Fabrication, Kano State Polytechnic, Kano, Kano State, Nigeria

<sup>5</sup>Department of Electrical Engineering, Aliko Dangote University of Science and Technology, Wudil, Kano State, 713101, Nigeria.

# Contributed equally

\*Corresponding authors: Xiaozhi Wang; xw224@zju.edu.cn · Gaosheng Zhao; zgs571@shu.edu.cn

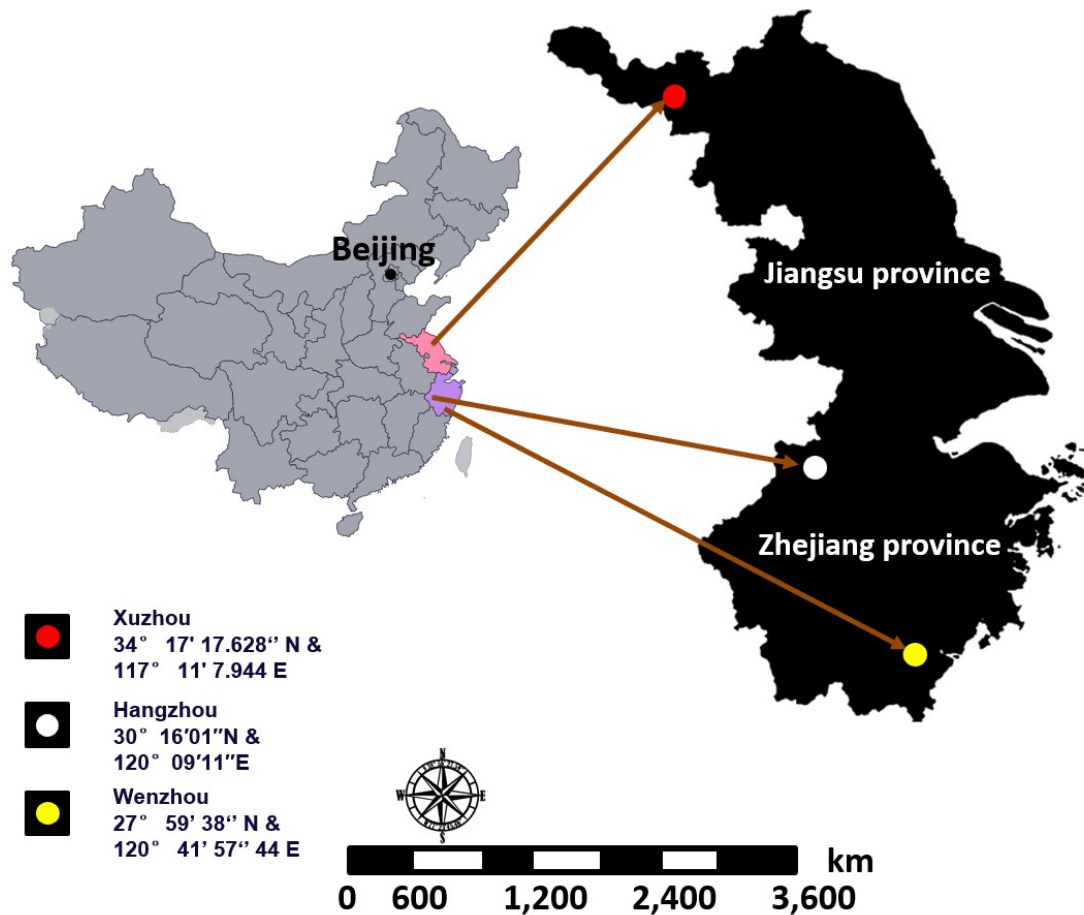

Figure S1 Map of the study area: Xuzhou, Hangzhou, and Wenzhou cities, China

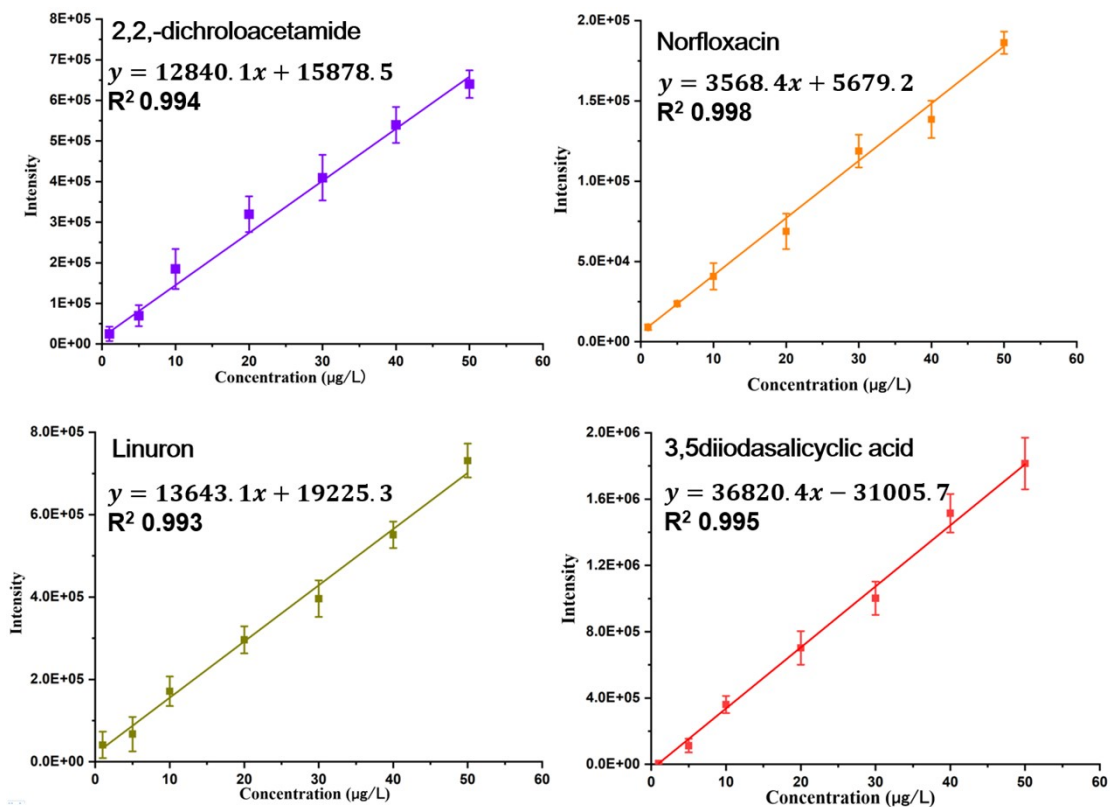

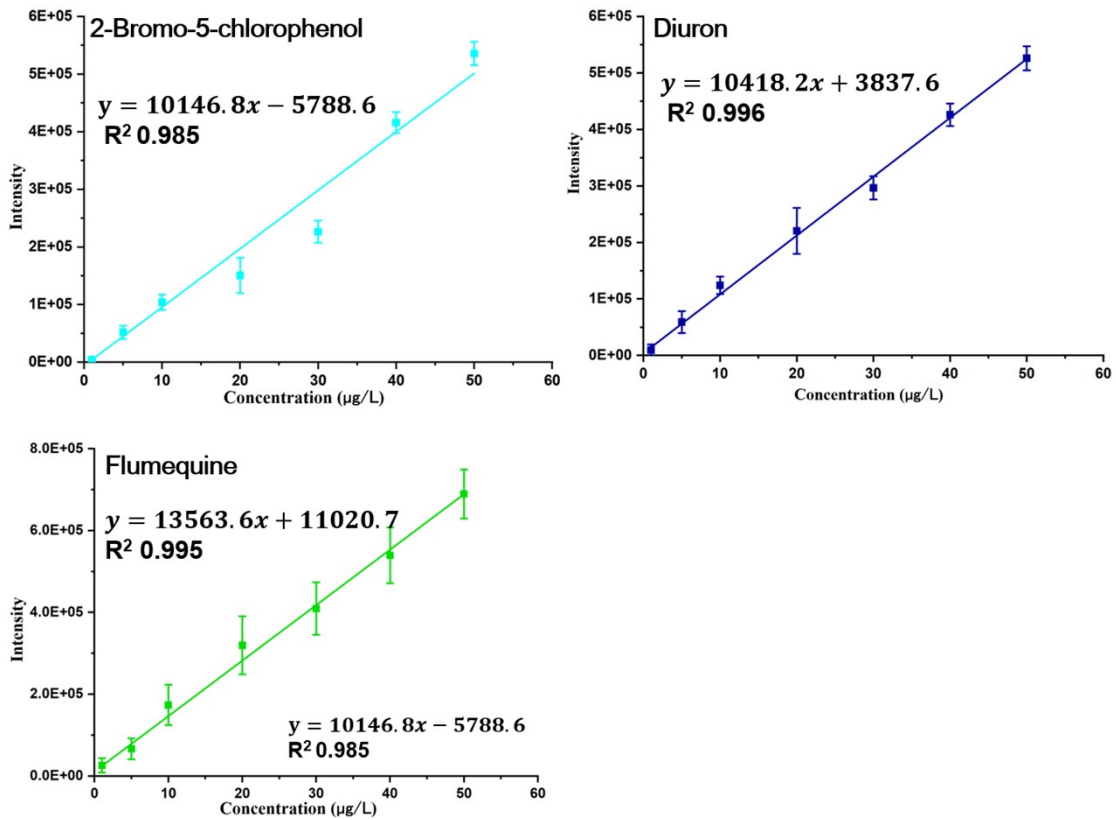

Figure S2. Calibration curve for H-compounds, including 2,2-dichloroacetamide, norfloxacin, linuron, 3,5-diidosalicylic acid, 2-bromo-5-chlorophenol, diuron, and flumequine. Each compound's response was measured across a range of concentrations to establish linearity and sensitivity, with calibration curves constructed by plotting peak intensity versus concentration.

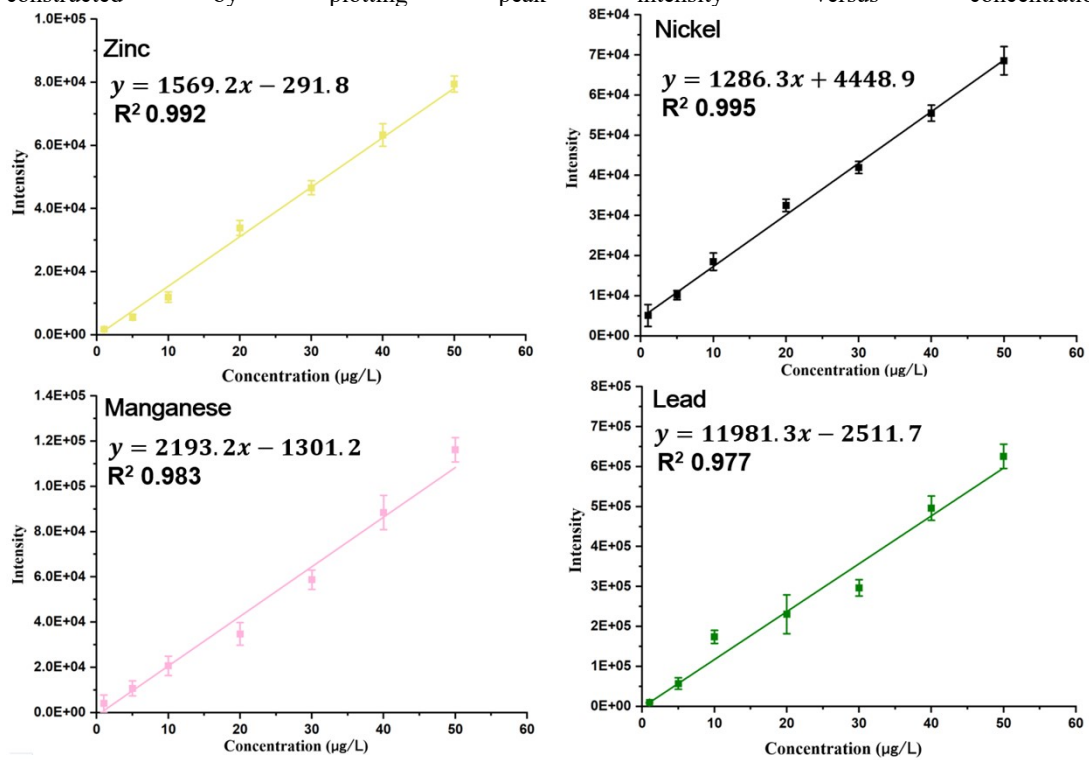

Figure S3. Calibration curves for heavy metals, including zinc, manganese, nickel, and lead. Each metal's response was measured across a series of standard concentrations to evaluate linearity and sensitivity.



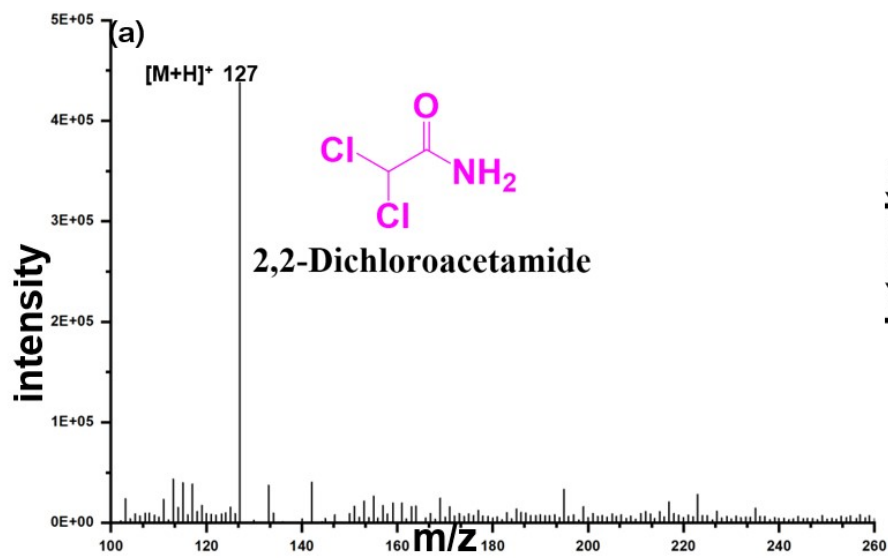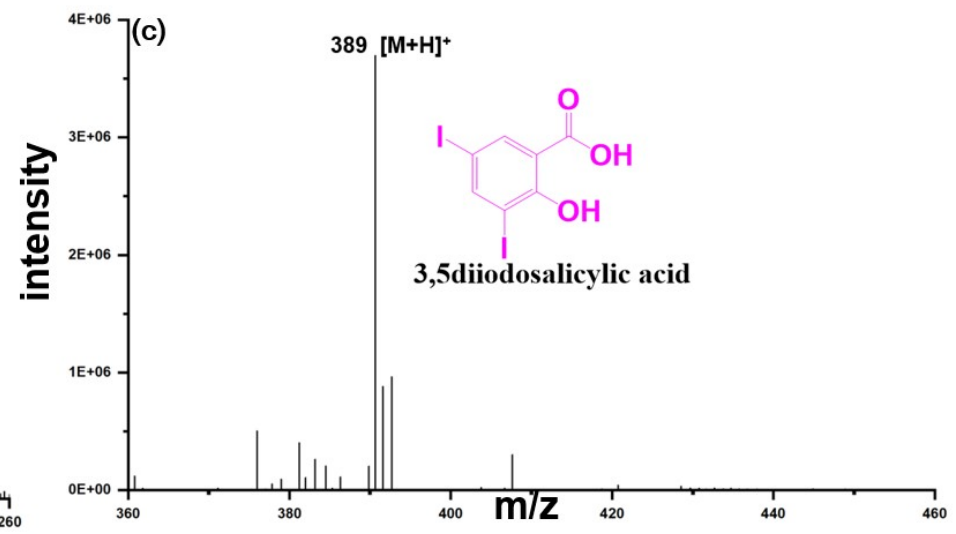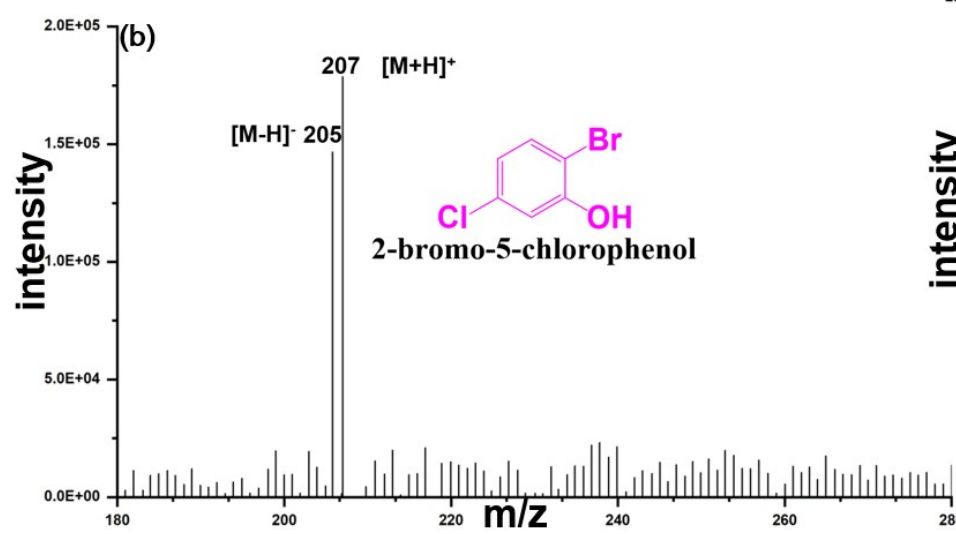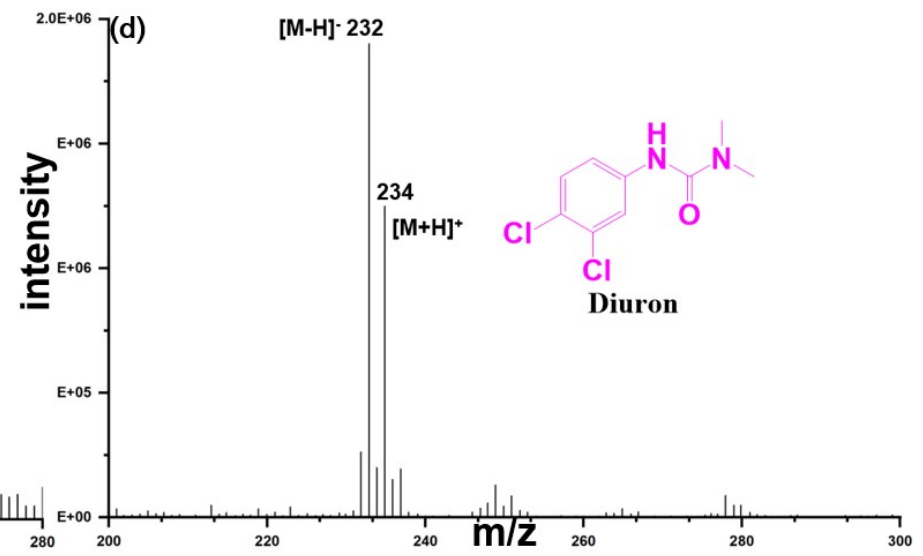

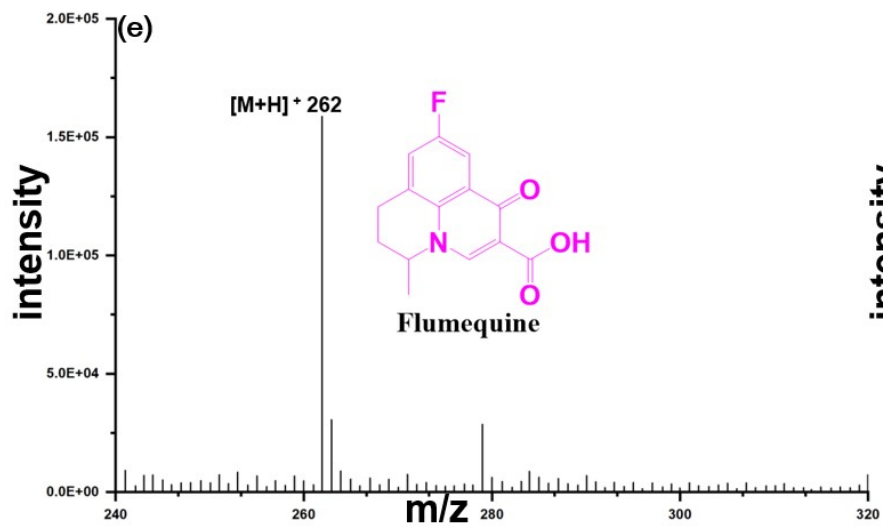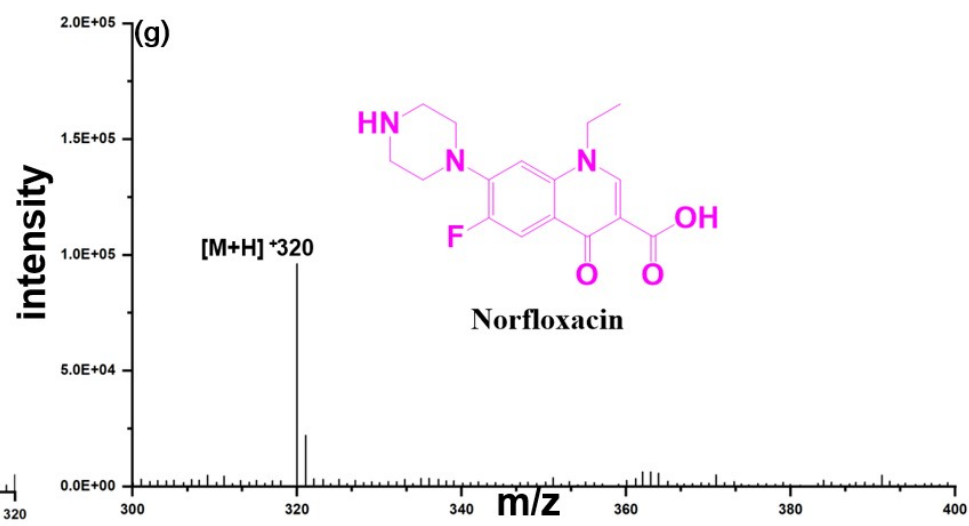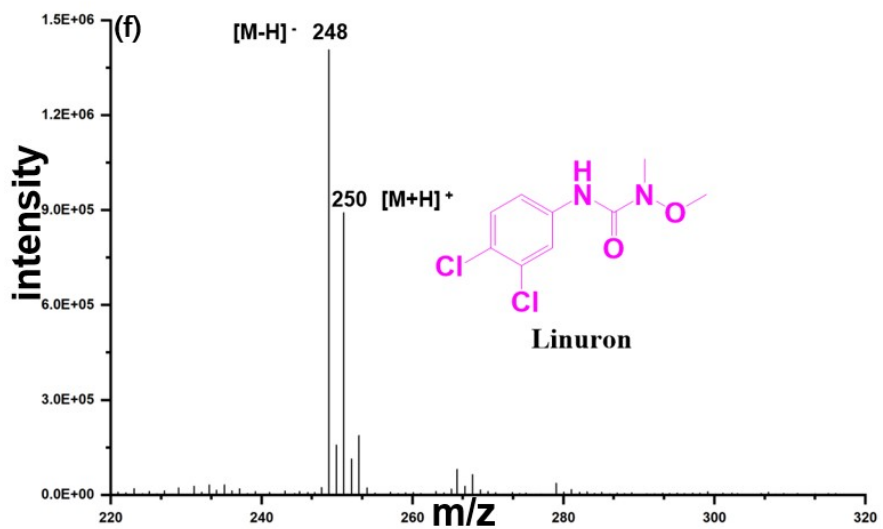

**Figure S4.** Mass spectra of 2,2-Dichloroacetamide (1000 µg/L) (a), 2-Bromo-5-chlorophenol (1000 µg/L) (b), 3,5-diiodosalicylic acid (1000 µg/L) (c), diuron (1000 µg/L) (d), flumequine (1000 µg/L) (e), linuron (1000 µg/L) (f), norfloxacin (1000 µg/L) (g) from soft microwave plasma torch mass spectrometer with power of 115 W and a microwave frequency of 2.45 GHz.

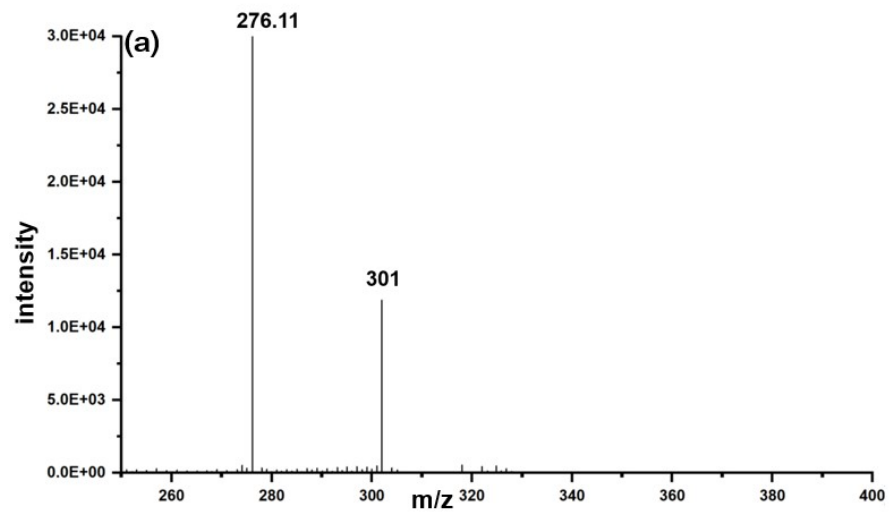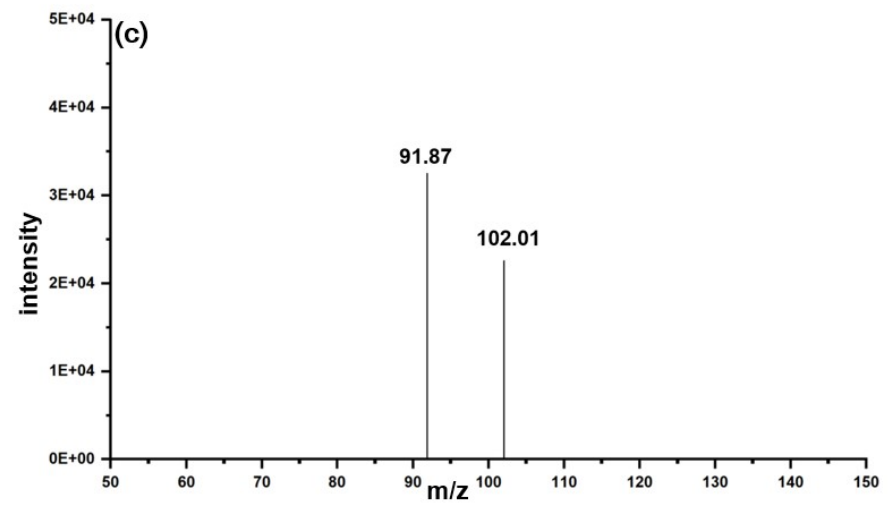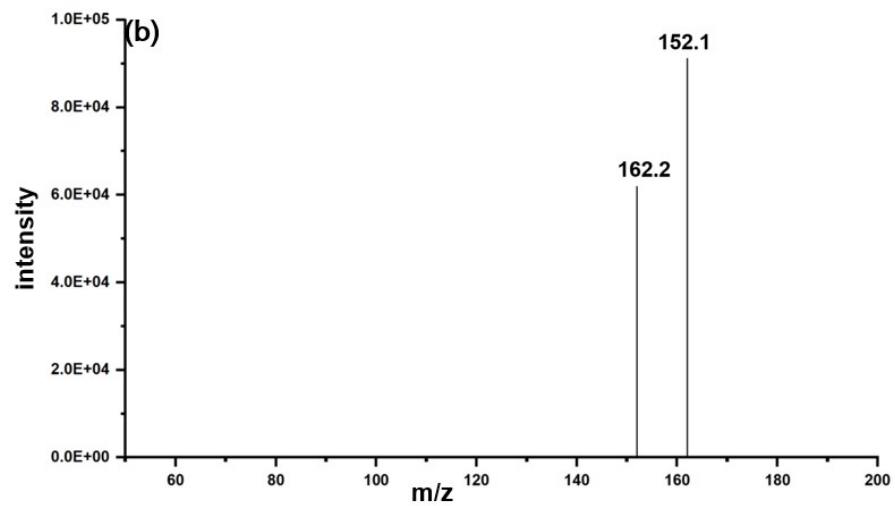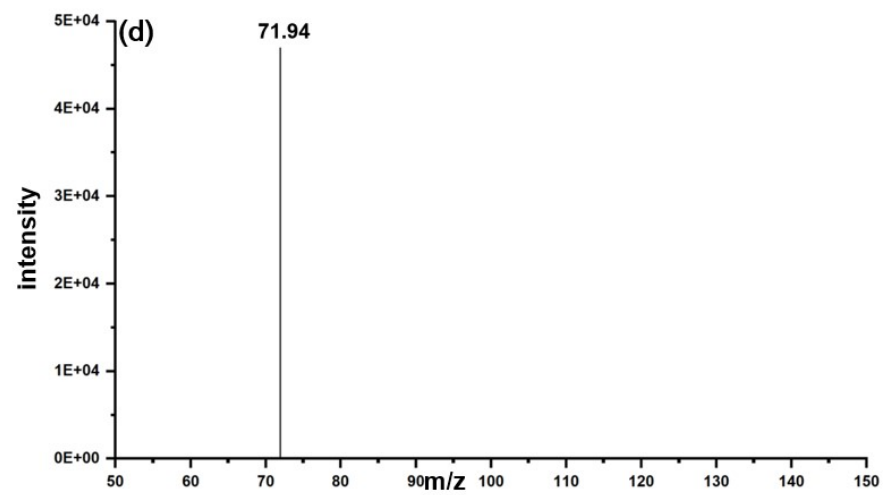



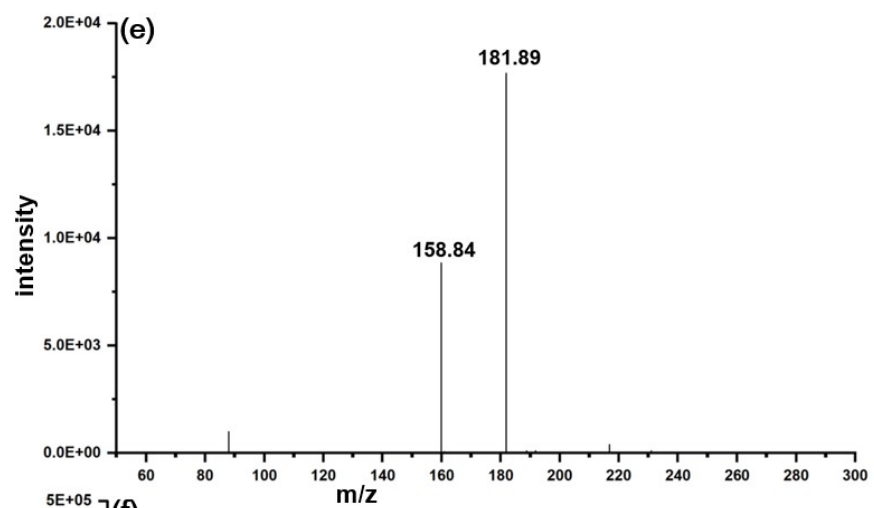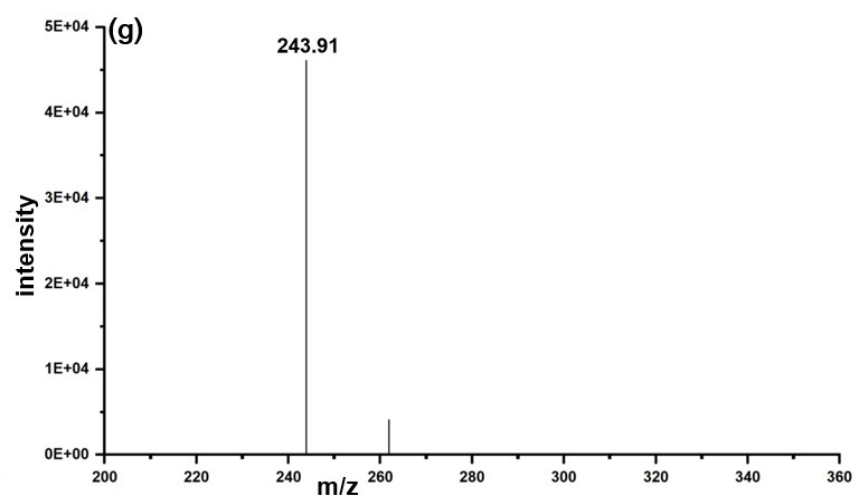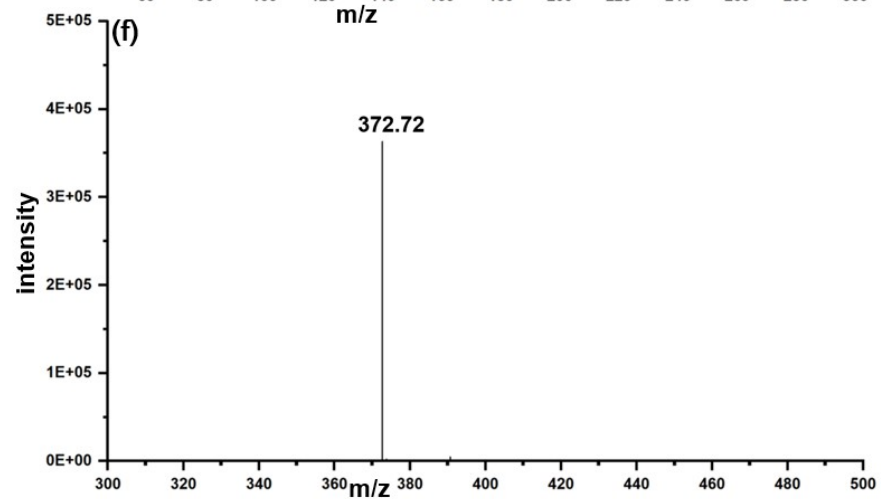

**Figure S5.** MS/MS Spectra of norfloxacin (m/z 320) (a), 2-Bromo-5-chlorophenol (m/z 207) (b), 2,2-Dichloroacetamide (m/z 127) (c), diuron (m/z 232) (d), linuron (m/z 248) (e), 3,5-diodosalicylic acid (m/z 389) (f), flumequine (m/z 262) (g)

**Table S1** Basic physicochemical properties of H-compounds.

| H- compounds               | Molecular formula                                              | Molecular weight (m/z) | Ion form                                          | MS <sup>2</sup> | Molecular structure                                                                   |
|----------------------------|----------------------------------------------------------------|------------------------|---------------------------------------------------|-----------------|---------------------------------------------------------------------------------------|
| 2,2,-<br>dichloroacetamide | <b>C<sub>2</sub>H<sub>3</sub>Cl<sub>2</sub>N</b>               | 126                    | 127 [M+H] <sup>+</sup>                            | 91.87/102       | 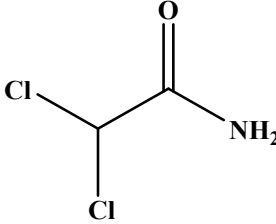   |
| Norfloxacin                | <b>C<sub>16</sub>H<sub>18</sub>FN<sub>3</sub></b>              | 319                    | 320 [M+H] <sup>+</sup>                            | 276.11/301      |   |
| Diuron                     | <b>C<sub>9</sub>H<sub>10</sub>Cl<sub>2</sub>N<sub>2</sub>O</b> | 233                    | 232/234 [M+H] <sup>+</sup> and [M+H] <sup>-</sup> | 71.90           |  |

Linuron

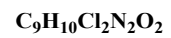

249

248/250  $[M+H]^+$  and  $[M+H]^-$

158.84/181.89

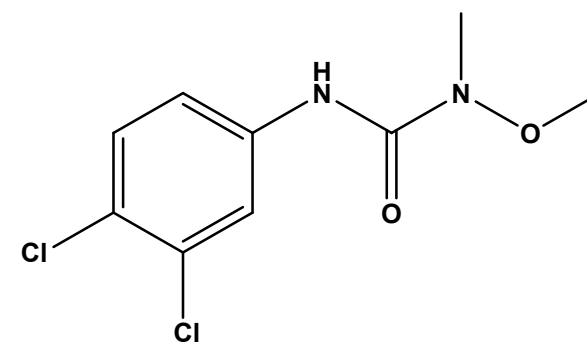

3,5-diiodosalicylic acid

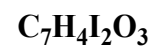

389.82

39  $[M+H]^+$

372.72

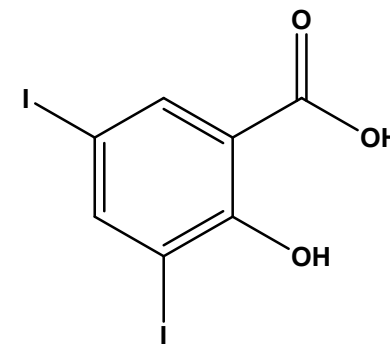

Flumequine

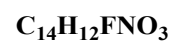

261

262 [M+H]<sup>+</sup>

243.91

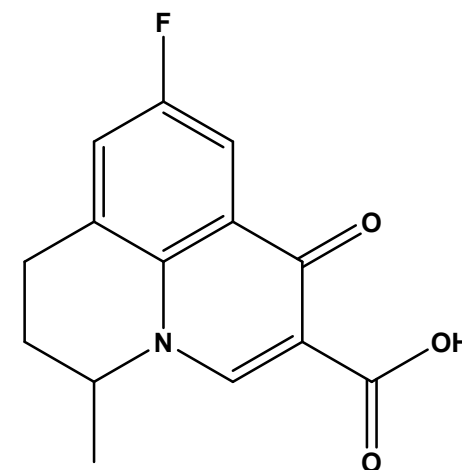

2-Bromo-5-chlorophenol

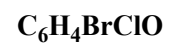

207.45

205/207 [M+H]<sup>+</sup> and [M+H]<sup>-</sup>

162.2/152.1

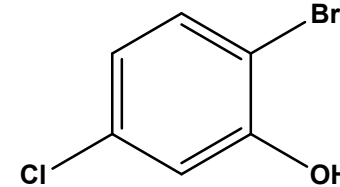

The coefficient of variation (CV) and the Standard deviation (Std Dev) measure relative variability are essential in assessing the precision of the recovery percentages. Some compounds show lower CV values, indicating more consistent recovery across samples from flooding irrigation systems. The p-values suggest that there are no significant differences between the groups' mean recovery percentages at a typical alpha level of 0.05. This means we cannot reject the null hypothesis that the means are equal.

However, from sub-irrigation systems, the variability, especially in 2-bromo-5-chlorophenol, highlighted by the higher CV, suggests that specific compounds may experience different interactions within the system.

The CV values from the lateral move irrigation system indicate that 3,5-diiodosalicylic acid shows the highest variability among the detected compounds, suggesting more fluctuations in its recovery rates across samples. Others exhibit lower CVs, indicating more consistent recovery rates.

This comprehensive statistical analysis helps validate the consistency of the detection method, supporting its reliability for analyzing these compounds in water samples.

**Table S2** Statistical data for consistency validation of detection method.

| <b>Samples</b> | <b>Compounds</b>               | <b>Std Dev</b> | <b>CV</b> | <b>Samples</b> | <b>Std Dev</b> | <b>CV</b> | <b>Samples</b> | <b>Std Dev</b> | <b>CV</b> |
|----------------|--------------------------------|----------------|-----------|----------------|----------------|-----------|----------------|----------------|-----------|
|                | <b>2,2,-dichloroacetamide</b>  | 8.21           | 8.69      |                | 7.29           | 8.00      |                | 8.77           | 9.41      |
|                | <b>Diuron</b>                  | 6.54           | 5.86      |                | 7.35           | 6.71      |                | 7.96           | 8.31      |
| Flood          | <b>Flumequine</b>              | 5.78           | 5.01      | Lateral move   | 8.51           | 7.54      | Sub-           | 8.03           | 6.79      |
| irrigation     | <b>2-bromo-5-chlorophenol</b>  | 5.83           | 5.25      | irrigation     | 6.89           | 8.01      | irrigation     | 10.33          | 11.56     |
| system         | <b>Norfloxacin</b>             | 8.19           | 7.84      | system         | 8.18           | 7.71      | systems        | 9.08           | 8.05      |
|                | <b>Linuron</b>                 | 9.97           | 8.91      |                | 7.99           | 9.02      |                | 9.31           | 9.07      |
|                | <b>3,5diiodosalicylic acid</b> | 7.86           | 8.01      |                | 8.55           | 12.57     |                | 8.70           | 8.24      |

**Table S3** Statistical data for consistency validation of detection method.

| <b>Samples</b>          | <b>Compounds</b> | <b>Std Dev</b> | <b>CV</b> | <b>Samples</b>                 | <b>Std Dev</b> | <b>CV</b> | <b>Samples</b>         | <b>Std Dev</b> | <b>CV</b> |
|-------------------------|------------------|----------------|-----------|--------------------------------|----------------|-----------|------------------------|----------------|-----------|
|                         | Zinc             | 7.04           | 7.29      |                                | 5.81           | 5.17      |                        | 5.22           | 5.55      |
| Flood irrigation system | Manganese        | 4.44           | 8.11      | Lateral move irrigation system | 7.15           | 7.01      | Sub-irrigation systems | 6.76           | 5.81      |
|                         | Nickel           | 7.08           | 6.53      |                                | 6.90           | 7.04      |                        | 6.13           | 5.92      |
|                         | Lead             | 5.68           | 6.55      |                                | 8.01           | 6.98      |                        | 6.33           | 5.56      |

**CV: Coefficient of Variation, Std Dev: Standard deviation**

**ANOVA p-value:** Flood irrigation system = 0.4105, Lateral move irrigation system = 0.4071, Sub-irrigation systems = 0.4094
